# Supplementary material for: Dynamic Metabolite Profiling in an Archaeon Connects Transcriptional Regulation to Metabolic Consequences
Source: PLOS journal article supplement (doi:10.1371/journal.pone.0135693), 2015-08-18
Supplement: S2 (10.1371/journal.pone.0135693.s002) [file journal.pone.0135693.s002]

## Supplementary Figure 2

$p$ -value of compariосn between  $\Delta ura3$  and  $\Delta trmB$

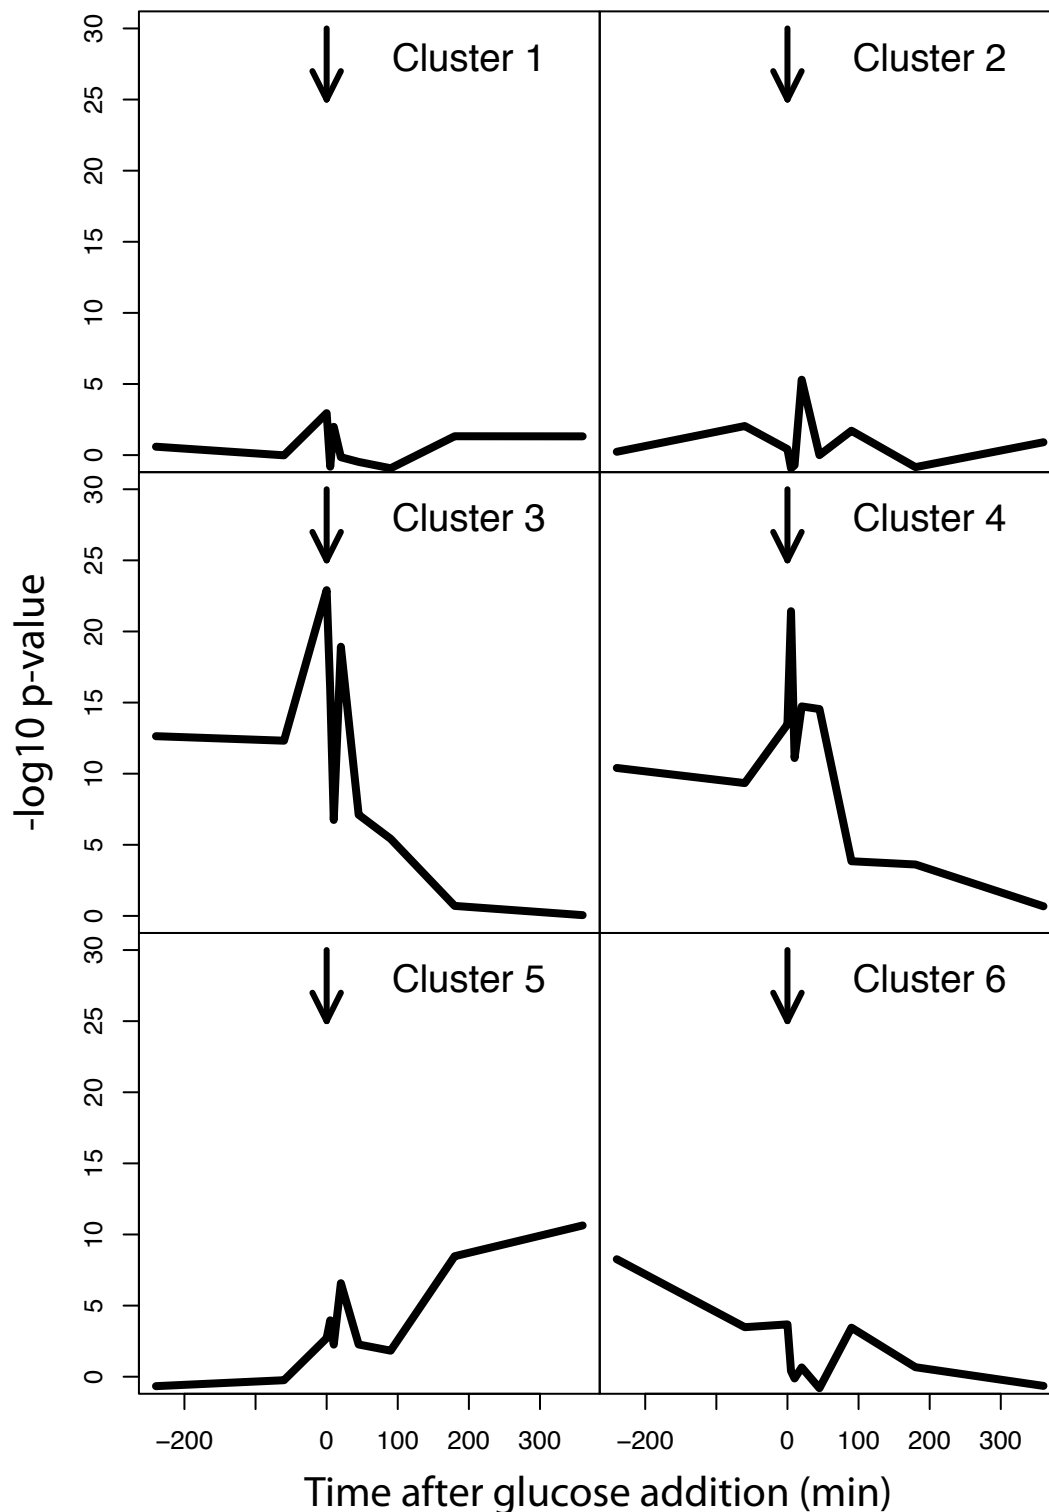

Supplementary Figure 2. Figure depicts the negative log10 p-value (higher value is more significant) of the T-test between metabolite levels in the  $\Delta ura3$  and  $\Delta trmB$  strains for each of the six clusters of metabolite patterns at each time point. Arrow depicts when glucose was added to a final concentration of 5%.
